# Supplementary material for: Nucleosome positioning sequence patterns as packing or regulatory
Source: PLoS Comput Biol. 2020 Jan 27;16(1):e1007365. doi: 10.1371/journal.pcbi.1007365 (PMC7004410; doi:10.1371/journal.pcbi.1007365)
Supplement: S1 Table — Tables in this spreadsheet comprise: Table 1. Distributions of dinucleotide peaks in human, mouse and yeast. Table 2. Dinucleotide patterns in human and mouse. Table 3. Comparison of peaks between human and mouse. Complementary to Fig 3. Table 4. Excel representation of peak distributions in human, mouse and yeast patterns as a ladder. Complementary to Fig 2. (XLSX) [file pcbi.1007365.s004.xlsx]

## Sheet: Table 1. YeastHumanMousePeaks
position	centered	shl	Groove	Yeast.Fig3	Human.apoptotic	Human.CD4+	Mouse.control	Mouse.susceptible	Mouse.resilient	shl
2	-72	NA	NA							NA
3	-71	NA	NA		GG	TT YY	GG	AA GG	AA GG	NA
4	-70	NA	NA	SS		CC	WW TT RR	WW TT RR	WW TT RR	NA
5	-69	-6.5	minor							-6.5
6	-68	-6.5	minor		AA	SS				-6.5
7	-67	-6.5	minor		WW RR	GG				-6.5
8	-66	-6.5	minor		TT			GG		-6.5
9	-65	NA	NA	WW RR	CC YY		SS AA GG	SS AA	SS AA GG	NA
10	-64	-6	major	SS YY			CC	CC	CC	-6
11	-63	-6	major			CC YY	TT	TT	WW RR	-6
12	-62	-6	major		GG	WW AA TT RR	WW RR	WW RR		-6
13	-61	-6	major	SS	SS					-6
14	-60	-6	major				CC	CC	CC	-6
15	-59	-5.5	minor		CC					-5.5
16	-58	-5.5	minor		YY				GG	-5.5
17	-57	-5.5	minor	WW RR	TT		SS GG	SS GG	SS	-5.5
18	-56	-5.5	minor		WW RR	GG				-5.5
19	-55	NA	NA	YY	AA	SS	CC	CC	CC	NA
20	-54	NA	NA			AA				NA
21	-53	-5	major			TT CC YY	YY	YY	YY	-5
22	-52	-5	major			WW RR	WW AA TT RR	WW AA TT RR	WW AA TT RR	-5
23	-51	-5	major	WW SS RR	GG					-5
24	-50	NA	NA		SS CC YY	AA				NA
25	-49	NA	NA	YY	TT					NA
26	-48	-4.5	minor							-4.5
27	-47	-4.5	minor	YY		GG				-4.5
28	-46	-4.5	minor	WW RR		SS				-4.5
29	-45	-4.5	minor	YY	WW AA RR		SS CC GG	SS CC GG	SS CC GG	-4.5
30	-44	NA	NA				YY	YY	YY	NA
31	-43	NA	NA		GG	CC YY				NA
32	-42	-4	major	SS	SS					-4
33	-41	-4	major			WW TT RR	WW AA TT RR	WW AA TT RR	WW AA TT RR	-4
34	-40	-4	major			AA				-4
35	-39	NA	NA	YY				GG	GG	NA
36	-38	NA	NA	YY		GG	GG			NA
37	-37	-3.5	minor		CC					-3.5
38	-36	-3.5	minor	WW SS RR						-3.5
39	-35	-3.5	minor		WW AA TT RR YY	SS				-3.5
40	-34	-3.5	minor				GG	GG	GG	-3.5
41	-33	NA	NA		GG	CC	SS CC	SS CC	SS CC	NA
42	-32	-3	major		SS	YY	YY	AA	YY	-3
43	-31	-3	major	SS		WW TT RR	WW AA TT RR	WW RR YY	WW AA TT RR	-3
44	-30	-3	major	YY	CC	AA		TT		-3
45	-29	-3	major					YY		-3
46	-28	NA	NA			GG				NA
47	-27	-2.5	minor		YY		GG	GG	GG	-2.5
48	-26	-2.5	minor		AA TT	SS				-2.5
49	-25	-2.5	minor	WW RR YY	WW RR			SS		-2.5
50	-24	-2.5	minor				SS CC	CC	SS CC	-2.5
51	-23	NA	NA			CC YY				NA
52	-22	-2	major				YY	YY	YY	-2
53	-21	-2	major		SS GG	TT	AA	AA	AA	-2
54	-20	-2	major	SS	CC	WW RR	WW TT RR	WW TT RR	WW TT RR	-2
55	-19	-2	major			AA				-2
56	-18	NA	NA		TT YY	GG				NA
57	-17	-1.5	minor	YY			GG			-1.5
58	-16	-1.5	minor					GG	GG	-1.5
59	-15	-1.5	minor	WW RR			WW RR	WW RR	WW RR	-1.5
60	-14	-1.5	minor		WW AA RR		TT	TT	TT	-1.5
61	-13	NA	NA			TT				NA
62	-12	-1	major		GG	CC YY	YY	YY	YY	-1
63	-11	-1	major	SS			SS CC	SS CC	SS CC	-1
64	-10	-1	major			WW SS RR	WW AA TT RR	AA	WW AA TT RR	-1
65	-9	-1	major	SS		AA		WW TT RR		-1
66	-8	NA	NA							NA
67	-7	-0.5	minor			GG				-0.5
68	-6	-0.5	minor	YY	TT		GG	SS GG	GG	-0.5
69	-5	-0.5	minor		YY		SS			-0.5
70	-4	-0.5	minor		CC	TT	WW AA RR	WW RR	WW AA RR	-0.5
71	-3	NA	NA		SS AA GG		TT	AA TT	TT	NA
72	-2	NA	NA			YY				NA
73	-1	NA	NA	WW SS RR		CC	CC	CC	CC	NA
74	0	NA	NA	WW SS RR		SS	SS	SS	SS	NA
75	1	NA	NA			GG	GG	GG	GG	NA
76	2	NA	NA	YY			YY	YY	YY	NA
77	3	0.5	minor		SS TT CC YY		AA	AA TT	AA	0.5
78	4	0.5	minor		GG	AA	WW TT RR	WW RR	WW TT RR	0.5
79	5	0.5	minor				SS			0.5
80	6	0.5	minor		AA		CC YY	SS CC YY	CC YY	0.5
81	7	NA	NA			CC				NA
82	8	1	major	SS		YY				1
83	9	1	major			TT		WW AA RR		1
84	10	1	major	SS		WW SS RR	WW AA TT RR	TT	WW AA TT RR	1
85	11	1	major				SS GG	SS GG	SS GG	1
86	12	NA	NA	YY	CC	GG				NA
87	13	1.5	minor		YY	AA				1.5
88	14	1.5	minor	WW RR	WW TT RR		AA	AA	AA	1.5
89	15	1.5	minor				WW RR	WW RR	WW RR	1.5
90	16	1.5	minor					CC	CC	1.5
91	17	NA	NA				CC			NA
92	18	2	major	YY	AA	CC YY				2
93	19	2	major	SS		TT				2
94	20	2	major		GG	WW RR	WW AA RR YY	WW AA RR YY	WW AA RR YY	2
95	21	2	major		SS CC	AA	TT	TT	TT	2
96	22	NA	NA							NA
97	23	2.5	minor			GG				2.5
98	24	2.5	minor	WW RR			SS GG	GG	SS GG	2.5
99	25	2.5	minor	YY	WW RR YY			SS		2.5
100	26	2.5	minor		AA TT	SS				2.5
101	27	NA	NA				CC	CC	CC	NA
102	28	3	major			CC				3
103	29	3	major			YY				3
104	30	3	major	SS	GG	TT	YY	AA YY	YY	3
105	31	3	major			WW AA RR	WW AA TT RR	WW RR	WW AA TT RR	3
106	32	NA	NA		SS			TT		NA
107	33	3.5	minor		CC	GG	SS GG	SS GG	SS GG	3.5
108	34	3.5	minor	YY	YY		CC	CC	CC	3.5
109	35	3.5	minor	WW SS RR	WW AA TT RR	SS				3.5
110	36	3.5	minor							3.5
111	37	NA	NA		GG					NA
112	38	NA	NA			CC YY	CC			NA
113	39	4	major					CC	CC	4
114	40	4	major			TT	YY	YY	YY	4
115	41	4	major	SS		WW AA RR	WW AA TT RR	WW AA TT RR	WW AA TT RR	4
116	42	NA	NA		SS					NA
117	43	NA	NA		CC YY	GG				NA
118	44	4.5	minor	YY						4.5
119	45	4.5	minor	WW RR	WW TT RR		SS CC GG	SS CC GG	SS CC GG	4.5
120	46	4.5	minor			SS				4.5
121	47	4.5	minor			CC				4.5
122	48	NA	NA			YY	YY	YY	YY	NA
123	49	NA	NA		AA					NA
124	50	5	major	WW SS RR YY	SS GG	TT				5
125	51	5	major		CC					5
126	52	5	major	YY	YY	WW RR	WW AA TT RR	WW AA TT RR	WW AA TT RR	5
127	53	NA	NA			AA GG				NA
128	54	NA	NA			TT				NA
129	55	5.5	minor		TT	SS YY	GG	GG	GG	5.5
130	56	5.5	minor	WW RR	WW RR	CC				5.5
131	57	5.5	minor	YY	AA		SS CC	SS CC	SS	5.5
132	58	5.5	minor				YY	YY	CC YY	5.5
133	59	6	major		GG					6
134	60	6	major	SS			GG	GG	GG	6
135	61	6	major		SS					6
136	62	6	major		CC	WW AA TT RR	WW RR	WW RR		6
137	63	6	major	SS	YY	GG	AA YY	AA YY	WW RR YY	6
138	64	NA	NA	WW RR			GG	GG	GG	NA
139	65	6.5	minor		GG		SS TT CC YY	SS TT	SS TT CC	6.5
140	66	6.5	minor		AA			CC		6.5
141	67	6.5	minor		WW RR	CC				6.5
142	68	6.5	minor		TT	SS YY				6.5
143	69	NA	NA	SS YY	YY					NA

## Sheet: Table 2. Dinucleotide frequency profiles
positionsc	apo.SS	cd4.SS	con.SS	sus.SS	res.SS	apo.WW	cd4.WW	con.WW	sus.WW	res.WW	apo.RR	cd4.RR	con.RR	sus.RR	res.RR	apo.YY	cd4.YY	con.YY	sus.YY	res.YY	apo.AA	cd4.AA	con.AA	sus.AA	res.AA	apo.TT	cd4.TT	con.TT	sus.TT	res.TT	apo.CC	cd4.CC	con.CC	sus.CC	res.CC	apo.GG	cd4.GG	con.GG	sus.GG	res.GG
-70	0.168746	0.227912	0.171327	0.168573	0.167608	0.317861	0.244907	0.2835	0.287917	0.288844	0.274726	0.286949	0.279157	0.277866	0.278031	0.285353	0.283505	0.291325	0.292104	0.292306	0.091751	0.076193	0.083385	0.083978	0.08434	0.094648	0.072913	0.086499	0.088397	0.088872	0.056062	0.071429	0.059334	0.058427	0.057988	0.053805	0.072415	0.056197	0.05534	0.05505
-69	0.168506	0.231418	0.168536	0.165777	0.164787	0.318222	0.243532	0.289149	0.293708	0.294826	0.278631	0.28423	0.278147	0.277349	0.277207	0.281269	0.287837	0.290066	0.290219	0.290508	0.092892	0.073598	0.083304	0.084018	0.084359	0.093421	0.074483	0.089463	0.091142	0.091782	0.055327	0.072466	0.05673	0.055718	0.05524	0.054341	0.074128	0.056264	0.055465	0.05511
-68	0.167109	0.2351	0.167542	0.164748	0.16367	0.321289	0.239811	0.290688	0.295329	0.296592	0.28111	0.286544	0.276732	0.275978	0.275676	0.280065	0.28524	0.289691	0.289861	0.290238	0.09482	0.072795	0.08293	0.083768	0.084059	0.093565	0.072631	0.09023	0.091798	0.092604	0.054823	0.072938	0.055825	0.054865	0.054355	0.054047	0.075891	0.055866	0.055005	0.054562
-67	0.164563	0.237987	0.167411	0.164543	0.163466	0.325315	0.236207	0.289252	0.294028	0.295218	0.282022	0.291008	0.277248	0.2762	0.275941	0.280892	0.279353	0.287874	0.288375	0.288693	0.096528	0.072074	0.082685	0.083555	0.083843	0.09493	0.070244	0.088922	0.09049	0.091339	0.054075	0.07259	0.055906	0.055054	0.054494	0.053338	0.077977	0.055949	0.054949	0.054497
-66	0.162652	0.238486	0.16798	0.165154	0.164235	0.328502	0.23429	0.287325	0.292153	0.292989	0.280732	0.293635	0.280313	0.278959	0.278944	0.282842	0.275287	0.285455	0.286258	0.286323	0.097017	0.071142	0.08318	0.08406	0.08435	0.096658	0.069352	0.087097	0.088735	0.089309	0.053391	0.070983	0.056054	0.055311	0.054812	0.052755	0.079244	0.056569	0.055498	0.055076
-65	0.162212	0.237968	0.168182	0.165429	0.164642	0.32967	0.234824	0.286248	0.291017	0.291661	0.278355	0.29306	0.282198	0.280729	0.280941	0.285205	0.275236	0.283583	0.284436	0.284298	0.096441	0.070179	0.08359	0.08443	0.084813	0.098235	0.070254	0.085579	0.087209	0.087557	0.053584	0.070091	0.056277	0.055569	0.055165	0.052531	0.079615	0.056906	0.055819	0.055436
-64	0.162643	0.237067	0.168606	0.165817	0.165194	0.328966	0.236756	0.286025	0.290847	0.291363	0.276155	0.290608	0.282981	0.281558	0.281895	0.286759	0.278198	0.282687	0.283505	0.283178	0.095335	0.070228	0.083879	0.084744	0.08516	0.098715	0.071751	0.084928	0.086585	0.086716	0.054226	0.070191	0.056552	0.055791	0.055474	0.052314	0.078753	0.057018	0.055951	0.055647
-63	0.16338	0.236398	0.168853	0.165943	0.165574	0.327131	0.238898	0.285845	0.290696	0.291265	0.275468	0.287752	0.283385	0.282026	0.282498	0.286997	0.282305	0.282327	0.283063	0.282605	0.094595	0.07053	0.084016	0.084949	0.085391	0.098159	0.073161	0.084309	0.085984	0.085996	0.054783	0.071134	0.056962	0.056104	0.055964	0.052339	0.077428	0.057019	0.055904	0.055719
-62	0.164199	0.235921	0.168662	0.165694	0.165421	0.324677	0.24044	0.286465	0.291396	0.291931	0.276098	0.285147	0.28337	0.282083	0.282548	0.285956	0.286123	0.281938	0.282705	0.282043	0.09373	0.070732	0.083977	0.084932	0.08533	0.096995	0.074543	0.084111	0.085874	0.08569	0.054777	0.072065	0.05714	0.056221	0.056173	0.052712	0.075972	0.056875	0.055767	0.055642
-61	0.165488	0.235248	0.168326	0.165323	0.165156	0.322344	0.242105	0.287149	0.292249	0.292522	0.276416	0.283557	0.283444	0.282236	0.282693	0.285134	0.288261	0.28139	0.282194	0.281332	0.092995	0.070892	0.083739	0.084756	0.084981	0.096202	0.075541	0.084133	0.086015	0.085638	0.054833	0.072639	0.056814	0.055864	0.055864	0.053264	0.075116	0.057114	0.055999	0.055994
-60	0.166652	0.234707	0.168275	0.165262	0.165234	0.320889	0.242719	0.287372	0.292599	0.292459	0.27526	0.283722	0.28319	0.282013	0.282444	0.285523	0.287857	0.280648	0.281502	0.28044	0.092207	0.071052	0.083486	0.084536	0.084545	0.095933	0.075766	0.083979	0.085914	0.085341	0.055256	0.072352	0.056562	0.055603	0.055579	0.053542	0.075075	0.057254	0.056151	0.056268
-59	0.166934	0.235548	0.168934	0.165946	0.165984	0.320636	0.241347	0.286058	0.291376	0.290988	0.273233	0.285178	0.282945	0.28174	0.282181	0.287184	0.28588	0.28004	0.280867	0.279795	0.091668	0.070959	0.083198	0.084294	0.084184	0.096429	0.074784	0.08296	0.084898	0.084266	0.055801	0.071903	0.056803	0.055843	0.05583	0.053273	0.075808	0.057517	0.056426	0.056588
-58	0.166386	0.237844	0.169463	0.166509	0.166412	0.32223	0.237926	0.283755	0.289074	0.28878	0.2713	0.287039	0.282783	0.281587	0.28198	0.289618	0.28338	0.279322	0.280112	0.279011	0.091524	0.070454	0.082586	0.083685	0.083598	0.09734	0.073107	0.081771	0.083671	0.083046	0.056153	0.071824	0.057043	0.056086	0.056014	0.052568	0.077149	0.05765	0.056578	0.056668
-57	0.165016	0.241129	0.169751	0.166852	0.166579	0.324699	0.233777	0.281491	0.286823	0.28677	0.270201	0.288309	0.283096	0.281916	0.282302	0.292037	0.28154	0.278571	0.279333	0.278313	0.092006	0.069406	0.081765	0.082848	0.082852	0.098602	0.071266	0.080789	0.082683	0.082189	0.05629	0.07241	0.056965	0.056046	0.055885	0.051638	0.078383	0.058031	0.056968	0.056995
-56	0.16379	0.244168	0.170277	0.167323	0.166994	0.327627	0.230019	0.280007	0.285358	0.285551	0.26973	0.288593	0.283281	0.282132	0.2824	0.293477	0.280484	0.278156	0.278975	0.278077	0.092867	0.068341	0.081107	0.08222	0.082255	0.099837	0.06965	0.08046	0.082338	0.082018	0.056174	0.073348	0.056808	0.055902	0.055664	0.050928	0.079441	0.058417	0.057327	0.057333
-55	0.162925	0.246173	0.17063	0.167658	0.167269	0.329355	0.227592	0.279377	0.284797	0.285192	0.270081	0.289623	0.282976	0.281845	0.282016	0.29298	0.279861	0.278649	0.279484	0.278907	0.093844	0.067957	0.080858	0.082025	0.082113	0.100256	0.068444	0.080465	0.082362	0.082251	0.055816	0.073991	0.056921	0.056039	0.055794	0.050598	0.080114	0.058492	0.057387	0.057323
-54	0.163291	0.247641	0.170544	0.167472	0.167036	0.329439	0.227422	0.279727	0.285168	0.285758	0.271708	0.291487	0.282031	0.280947	0.281016	0.291153	0.279803	0.279416	0.280127	0.279862	0.094395	0.06886	0.081003	0.082184	0.082346	0.099697	0.06829	0.080729	0.082607	0.08266	0.055393	0.074725	0.057211	0.056261	0.056054	0.051056	0.080767	0.058011	0.056914	0.056765
-53	0.164424	0.248105	0.169694	0.166634	0.166125	0.327529	0.228578	0.280616	0.286071	0.286837	0.2739	0.291517	0.281352	0.280364	0.280373	0.289209	0.280903	0.280481	0.281014	0.280998	0.094512	0.069573	0.081431	0.082634	0.082875	0.098221	0.068959	0.0811	0.082952	0.083145	0.055261	0.07562	0.057394	0.056394	0.056208	0.052028	0.080449	0.057341	0.056311	0.056058
-52	0.165723	0.246923	0.168426	0.165403	0.164812	0.324535	0.230628	0.281957	0.287286	0.288255	0.275698	0.289061	0.281215	0.280301	0.280262	0.287625	0.283025	0.281087	0.281534	0.28163	0.093923	0.069693	0.081957	0.083095	0.083451	0.096665	0.070075	0.081561	0.083351	0.083663	0.055462	0.076337	0.057215	0.056173	0.05598	0.052945	0.079282	0.05667	0.055693	0.055385
-51	0.16678	0.244739	0.167589	0.164658	0.163948	0.321534	0.232287	0.283214	0.288533	0.289567	0.276803	0.28643	0.281535	0.280639	0.280608	0.286558	0.284288	0.281264	0.281745	0.281839	0.093347	0.069567	0.082371	0.083519	0.083911	0.09529	0.070601	0.081987	0.083745	0.084122	0.055835	0.076521	0.056895	0.055898	0.055647	0.053513	0.077914	0.056467	0.055481	0.05516
-50	0.168139	0.242969	0.167374	0.164444	0.163728	0.31908	0.233258	0.283821	0.289202	0.290231	0.277169	0.286569	0.281796	0.28083	0.280935	0.285957	0.283588	0.280871	0.281451	0.281425	0.092713	0.069904	0.082574	0.083709	0.084143	0.094184	0.070386	0.082052	0.083812	0.084179	0.056413	0.076087	0.056654	0.055703	0.055439	0.053919	0.077745	0.056514	0.055483	0.055206
-49	0.169127	0.242919	0.167681	0.164703	0.164036	0.317571	0.232889	0.283493	0.288988	0.289932	0.276958	0.289115	0.28201	0.280898	0.281165	0.286008	0.281437	0.28009	0.280708	0.280547	0.092446	0.070441	0.082327	0.08346	0.083918	0.093488	0.069572	0.081704	0.083463	0.083763	0.056942	0.075499	0.056612	0.055683	0.055424	0.053978	0.078632	0.056765	0.055684	0.055437
-48	0.169339	0.243964	0.168145	0.165143	0.16451	0.317729	0.231103	0.282248	0.287793	0.288673	0.276278	0.291748	0.282443	0.281229	0.281564	0.286348	0.278578	0.279308	0.279961	0.279733	0.092636	0.07045	0.081949	0.083032	0.083511	0.093175	0.068306	0.081023	0.082822	0.08306	0.057504	0.074745	0.05668	0.055773	0.055515	0.053514	0.079999	0.057072	0.055986	0.055752
-47	0.168038	0.245154	0.168979	0.166009	0.165362	0.319243	0.229147	0.280522	0.286107	0.286817	0.276195	0.29432	0.283027	0.281769	0.282059	0.286082	0.27556	0.278761	0.279516	0.279174	0.093419	0.070387	0.081388	0.082463	0.082874	0.09319	0.067241	0.080411	0.08229	0.082429	0.057413	0.074065	0.056945	0.056063	0.055772	0.052939	0.080986	0.057406	0.056343	0.056095
-46	0.166239	0.246315	0.170085	0.167103	0.166566	0.321447	0.227068	0.278503	0.284085	0.284585	0.277661	0.295898	0.283403	0.282158	0.282373	0.284528	0.273279	0.278571	0.279473	0.279044	0.094722	0.070181	0.080941	0.082038	0.082348	0.093186	0.066329	0.079898	0.081872	0.081841	0.056795	0.073647	0.057292	0.056429	0.056187	0.052561	0.081634	0.057776	0.056692	0.056484
-45	0.164825	0.247074	0.171466	0.168485	0.168084	0.323167	0.225527	0.27633	0.281925	0.282241	0.28038	0.295878	0.283119	0.281919	0.282048	0.281906	0.272816	0.278657	0.279684	0.279195	0.095819	0.069643	0.080345	0.081486	0.081686	0.093069	0.065883	0.07925	0.081272	0.08113	0.055761	0.073932	0.057876	0.057002	0.056847	0.052967	0.081638	0.058072	0.05702	0.056836
-44	0.164212	0.247551	0.172538	0.169575	0.169248	0.324266	0.224651	0.274365	0.279847	0.280147	0.283141	0.294054	0.282598	0.281459	0.281529	0.279152	0.27399	0.278834	0.279818	0.279487	0.096603	0.069105	0.079877	0.081	0.081152	0.092894	0.065803	0.078494	0.080487	0.080343	0.054631	0.07456	0.058403	0.05751	0.05745	0.053636	0.081122	0.058234	0.057165	0.057048
-43	0.164317	0.24745	0.172834	0.169946	0.169626	0.324713	0.224765	0.273241	0.278605	0.27899	0.28496	0.291496	0.282233	0.281138	0.281122	0.277372	0.276413	0.278947	0.279848	0.279632	0.096876	0.068659	0.079654	0.080755	0.080863	0.092827	0.066172	0.07799	0.079934	0.079869	0.053876	0.075475	0.058611	0.057719	0.057677	0.054419	0.080118	0.058249	0.057187	0.05711
-42	0.164676	0.246762	0.172362	0.169452	0.169156	0.324354	0.225629	0.273644	0.278934	0.279367	0.285563	0.28947	0.282244	0.281199	0.281156	0.276062	0.278658	0.279182	0.280075	0.279865	0.096785	0.0686	0.079845	0.080945	0.081021	0.092701	0.066755	0.078167	0.080094	0.080027	0.053256	0.076031	0.058458	0.057555	0.057534	0.054912	0.07926	0.058087	0.056992	0.056945
-41	0.164919	0.245792	0.171573	0.168591	0.168369	0.323254	0.227145	0.274784	0.280137	0.280531	0.285582	0.288875	0.282643	0.28168	0.281598	0.275021	0.27986	0.279132	0.280027	0.279699	0.096434	0.068799	0.080222	0.081431	0.081439	0.092346	0.067403	0.078678	0.080593	0.080492	0.052943	0.076263	0.05813	0.057197	0.057179	0.055012	0.078833	0.057993	0.056905	0.056867
-40	0.165089	0.245093	0.171325	0.168253	0.16805	0.322463	0.228429	0.275841	0.281281	0.281606	0.285144	0.28973	0.283457	0.282586	0.282548	0.274373	0.279075	0.278624	0.279436	0.279131	0.096006	0.069275	0.08069	0.081971	0.081946	0.091931	0.067686	0.078866	0.080752	0.08068	0.052792	0.075823	0.057872	0.056881	0.05688	0.054957	0.079002	0.058142	0.057066	0.057027
-39	0.16456	0.244893	0.171646	0.168613	0.168325	0.322425	0.228877	0.275952	0.28145	0.281761	0.284376	0.292009	0.284391	0.283555	0.283463	0.274964	0.276799	0.277876	0.278602	0.278358	0.095859	0.069652	0.08071	0.082019	0.081993	0.092009	0.067714	0.078905	0.08079	0.080771	0.052781	0.074994	0.057658	0.056667	0.056616	0.054408	0.079802	0.05864	0.057603	0.0575
-38	0.163773	0.245116	0.172158	0.169147	0.16878	0.323804	0.228379	0.275028	0.280485	0.280851	0.283331	0.294897	0.28511	0.284197	0.284121	0.276158	0.273707	0.277289	0.278033	0.277875	0.096089	0.069779	0.080344	0.081577	0.081626	0.0926	0.067287	0.078825	0.080756	0.080757	0.05303	0.073769	0.057418	0.056438	0.056372	0.053645	0.081114	0.059179	0.058108	0.057976
-37	0.162929	0.245986	0.172713	0.169737	0.16932	0.325443	0.226949	0.27369	0.279186	0.279578	0.282652	0.297491	0.285089	0.284068	0.284032	0.277534	0.27075	0.277144	0.277964	0.277748	0.096382	0.069608	0.079785	0.081	0.081089	0.093588	0.066653	0.078693	0.08068	0.080659	0.053199	0.072688	0.057302	0.056357	0.056264	0.053137	0.082455	0.059579	0.05848	0.058309
-36	0.162874	0.247314	0.17355	0.170541	0.170096	0.327507	0.225079	0.272076	0.277567	0.277971	0.282385	0.298571	0.284277	0.283175	0.283267	0.278591	0.269227	0.277545	0.278445	0.278163	0.096736	0.069213	0.079181	0.080353	0.080536	0.094628	0.065695	0.078438	0.080441	0.080379	0.053694	0.072417	0.057575	0.056649	0.056526	0.052865	0.083215	0.059605	0.05847	0.058298
-35	0.162706	0.248817	0.174363	0.171351	0.170864	0.329846	0.222916	0.270281	0.275815	0.27618	0.282668	0.297376	0.283016	0.281909	0.282044	0.279602	0.269701	0.278231	0.279145	0.278784	0.09712	0.068527	0.078507	0.079675	0.07987	0.095643	0.064958	0.077903	0.079913	0.079814	0.053979	0.073112	0.058145	0.057228	0.057072	0.052831	0.082959	0.059442	0.058339	0.058117
-34	0.162083	0.249868	0.175045	0.172004	0.171556	0.331794	0.221433	0.268682	0.274129	0.274467	0.28274	0.294723	0.282007	0.281012	0.281111	0.280454	0.272358	0.279125	0.279996	0.279702	0.097451	0.067768	0.077955	0.07913	0.079306	0.096486	0.064846	0.07749	0.079454	0.079355	0.053916	0.074529	0.058725	0.057775	0.057636	0.052648	0.082081	0.059307	0.058257	0.058022
-33	0.161787	0.250027	0.175432	0.172416	0.172052	0.332142	0.221247	0.267375	0.272725	0.273058	0.282956	0.291443	0.281656	0.280887	0.280873	0.280561	0.275373	0.279871	0.280599	0.280411	0.097501	0.067413	0.077688	0.078927	0.079015	0.096804	0.06525	0.077072	0.078952	0.078907	0.053614	0.075637	0.059157	0.058174	0.058089	0.052963	0.080868	0.059263	0.058259	0.058057
-32	0.161944	0.249356	0.175734	0.172725	0.172493	0.330156	0.222277	0.266981	0.272239	0.272541	0.282982	0.289049	0.281798	0.281268	0.281163	0.279716	0.278243	0.280452	0.280994	0.280901	0.096947	0.067519	0.077778	0.079097	0.079125	0.096198	0.066022	0.076959	0.078717	0.078712	0.053129	0.076402	0.059412	0.058396	0.058359	0.053419	0.079795	0.059325	0.058325	0.058193
-31	0.162778	0.248181	0.175849	0.172858	0.172693	0.327623	0.224188	0.267263	0.272518	0.272711	0.282732	0.287706	0.282075	0.281621	0.281463	0.278889	0.280426	0.280856	0.281311	0.28122	0.096258	0.067898	0.078063	0.079398	0.079401	0.095291	0.066966	0.077036	0.078759	0.078742	0.053204	0.076703	0.05963	0.058644	0.058644	0.053794	0.079145	0.05929	0.058256	0.058157
-30	0.162973	0.247199	0.175679	0.172679	0.172559	0.32603	0.225968	0.267773	0.273054	0.273153	0.281966	0.287989	0.282458	0.281888	0.281821	0.27896	0.281294	0.281007	0.281475	0.281346	0.095668	0.068302	0.078316	0.079635	0.079653	0.094734	0.067876	0.077242	0.079002	0.07893	0.053273	0.076583	0.059588	0.058585	0.058641	0.053694	0.079076	0.059323	0.058246	0.058159
-29	0.1629	0.246569	0.175689	0.172701	0.172565	0.326141	0.22673	0.267988	0.273234	0.273269	0.280741	0.289594	0.283211	0.282468	0.282491	0.280242	0.280192	0.280919	0.281481	0.281284	0.095521	0.068586	0.078397	0.079627	0.079659	0.094868	0.068113	0.07745	0.079248	0.079143	0.05358	0.075837	0.059466	0.058503	0.058563	0.05336	0.079624	0.059482	0.058379	0.058307
-28	0.162284	0.246617	0.176189	0.173302	0.17309	0.327246	0.226273	0.267053	0.272258	0.272294	0.279527	0.291622	0.283638	0.282792	0.28292	0.281833	0.277788	0.280697	0.281359	0.281078	0.095793	0.068635	0.077922	0.079104	0.079157	0.095385	0.067489	0.077421	0.079249	0.079112	0.053727	0.075027	0.059439	0.058489	0.058523	0.052915	0.08039	0.059864	0.058798	0.058711
-27	0.161258	0.247465	0.177233	0.174388	0.17413	0.329327	0.224457	0.265277	0.270456	0.27043	0.278316	0.2929	0.28347	0.282592	0.282794	0.283059	0.275626	0.28065	0.281403	0.280977	0.095996	0.068273	0.077126	0.078264	0.078309	0.096251	0.066357	0.077019	0.078863	0.07865	0.053724	0.074716	0.05969	0.05876	0.058741	0.052347	0.081324	0.060404	0.059382	0.059285
-26	0.160199	0.249138	0.178327	0.175463	0.175255	0.332054	0.222271	0.263112	0.268277	0.26815	0.277598	0.292316	0.282548	0.281633	0.281885	0.28401	0.274878	0.280456	0.281291	0.280738	0.096566	0.067559	0.076156	0.077294	0.077328	0.097501	0.065268	0.076311	0.078163	0.077864	0.053575	0.075061	0.060095	0.059154	0.059127	0.051866	0.081838	0.060841	0.059823	0.059729
-25	0.15923	0.250461	0.179191	0.176299	0.176158	0.334557	0.219903	0.261344	0.266463	0.266208	0.277741	0.290102	0.281564	0.280633	0.280881	0.284503	0.275562	0.2803	0.281178	0.280585	0.097068	0.066458	0.075458	0.076619	0.07657	0.098692	0.064546	0.07551	0.07734	0.07698	0.053343	0.07578	0.060404	0.05946	0.059459	0.05164	0.08161	0.061023	0.059975	0.059907
-24	0.158424	0.251354	0.17956	0.176659	0.176544	0.336024	0.218729	0.260104	0.26516	0.26482	0.278276	0.286788	0.280979	0.280112	0.280201	0.284104	0.277297	0.280082	0.280903	0.280395	0.097501	0.065406	0.075115	0.076333	0.076201	0.099032	0.064499	0.074851	0.076623	0.076271	0.052835	0.076658	0.060606	0.059665	0.059657	0.051703	0.08086	0.060895	0.059813	0.059776
-23	0.157826	0.25126	0.179813	0.176873	0.176764	0.336106	0.218117	0.259255	0.264362	0.264011	0.279043	0.283499	0.280681	0.279936	0.27988	0.282933	0.279681	0.280245	0.280884	0.280622	0.097307	0.064537	0.075077	0.076347	0.076149	0.098931	0.064857	0.074395	0.076137	0.075858	0.052243	0.077371	0.060798	0.059815	0.059829	0.05209	0.079976	0.060788	0.059716	0.059657
-22	0.158055	0.250967	0.179931	0.176828	0.176786	0.334845	0.218617	0.258943	0.264148	0.263804	0.27897	0.28131	0.280705	0.280123	0.279871	0.281079	0.282058	0.280974	0.281429	0.281326	0.096582	0.064339	0.075237	0.076575	0.076338	0.098101	0.065532	0.07438	0.076101	0.075901	0.051729	0.07797	0.061102	0.060051	0.06005	0.052542	0.079423	0.060642	0.05954	0.059507
-21	0.159278	0.250076	0.179527	0.176321	0.176372	0.332565	0.219502	0.25992	0.265258	0.264914	0.278456	0.280625	0.280863	0.280408	0.280052	0.279659	0.28359	0.281517	0.281881	0.281873	0.095402	0.064651	0.075681	0.077096	0.07681	0.097044	0.066247	0.074782	0.076534	0.076389	0.051733	0.078067	0.061068	0.059962	0.060013	0.053259	0.078954	0.060578	0.059452	0.059423
-20	0.160799	0.249154	0.178724	0.175505	0.175556	0.32999	0.221066	0.262055	0.267527	0.267123	0.277329	0.281787	0.281562	0.281135	0.280773	0.27883	0.283565	0.281746	0.282189	0.282105	0.094073	0.06552	0.076488	0.077982	0.077667	0.095893	0.066735	0.075616	0.077427	0.077266	0.052169	0.077865	0.060751	0.059629	0.059673	0.053804	0.078832	0.060493	0.059347	0.059342
-19	0.161467	0.248144	0.177823	0.174652	0.174664	0.328358	0.222567	0.263939	0.269495	0.269063	0.275852	0.284065	0.282331	0.281782	0.281585	0.279389	0.282074	0.281547	0.282122	0.281955	0.092838	0.066549	0.077109	0.078562	0.078311	0.095568	0.066852	0.076372	0.078233	0.078046	0.052569	0.077187	0.060265	0.059188	0.059225	0.053944	0.078987	0.060422	0.05927	0.059272
-18	0.161289	0.247378	0.177604	0.174467	0.174432	0.328124	0.223278	0.264478	0.270021	0.269598	0.274227	0.286431	0.282652	0.281887	0.281893	0.280668	0.279852	0.281143	0.281824	0.281592	0.092169	0.067307	0.077014	0.078358	0.078217	0.096033	0.066406	0.076704	0.078561	0.078373	0.052759	0.076322	0.060006	0.058961	0.058967	0.053684	0.07944	0.06051	0.059346	0.059363
-17	0.160682	0.24723	0.178022	0.174905	0.174846	0.328787	0.223177	0.263079	0.268487	0.268146	0.273119	0.287985	0.282328	0.281429	0.281568	0.281807	0.277505	0.280622	0.281367	0.281065	0.092182	0.067429	0.076244	0.077482	0.077424	0.096671	0.065894	0.076338	0.078147	0.077982	0.052686	0.075642	0.059959	0.058958	0.058935	0.053152	0.079836	0.060714	0.059538	0.059567
-16	0.160204	0.247681	0.178943	0.175796	0.175732	0.329938	0.222132	0.260962	0.266224	0.265974	0.273545	0.28836	0.281722	0.280815	0.280959	0.281911	0.275717	0.27991	0.280694	0.280317	0.093056	0.066869	0.075245	0.076457	0.076429	0.097172	0.065276	0.075646	0.077448	0.077242	0.052575	0.075245	0.060099	0.05909	0.059065	0.052788	0.080224	0.061117	0.059922	0.05995
-15	0.159596	0.248517	0.179856	0.176728	0.176643	0.331201	0.220848	0.259108	0.264299	0.264026	0.275711	0.28747	0.281353	0.280498	0.280595	0.280647	0.274877	0.279464	0.280233	0.279823	0.094651	0.066103	0.074712	0.075936	0.075865	0.097113	0.064711	0.07492	0.076709	0.076457	0.052256	0.075364	0.06031	0.059309	0.059282	0.052583	0.080159	0.061389	0.060247	0.060231
-14	0.158582	0.248841	0.180274	0.177178	0.17708	0.332748	0.21921	0.25844	0.263553	0.263243	0.279115	0.285938	0.281027	0.280243	0.280259	0.278369	0.275394	0.279564	0.280242	0.279883	0.096495	0.06524	0.074645	0.075883	0.075764	0.096901	0.064278	0.07466	0.076423	0.076126	0.051516	0.075554	0.060498	0.0595	0.059496	0.05272	0.079951	0.061383	0.060277	0.060243
-13	0.157543	0.249451	0.180345	0.177286	0.177125	0.334232	0.218136	0.258536	0.263679	0.263301	0.282839	0.28445	0.280863	0.280175	0.280064	0.275605	0.276832	0.280108	0.280674	0.280424	0.098211	0.064797	0.074979	0.076279	0.076062	0.096602	0.064253	0.074735	0.076425	0.076186	0.050446	0.076007	0.060595	0.059607	0.059583	0.053156	0.079536	0.061198	0.060123	0.060046
-12	0.157249	0.249739	0.180522	0.177377	0.177257	0.334817	0.217328	0.258191	0.263354	0.263013	0.285802	0.283684	0.281041	0.28049	0.280263	0.273386	0.278636	0.280922	0.28141	0.281183	0.099125	0.064666	0.075193	0.076561	0.076309	0.096286	0.064342	0.074791	0.07645	0.07622	0.049735	0.076621	0.060867	0.059867	0.059849	0.053871	0.079166	0.061063	0.059944	0.059897
-11	0.157601	0.250385	0.18115	0.1779	0.177856	0.333924	0.217249	0.257661	0.262891	0.262534	0.286818	0.283531	0.281577	0.281136	0.280847	0.271897	0.280264	0.281564	0.281993	0.281761	0.098981	0.064948	0.07536	0.07681	0.076475	0.095857	0.06442	0.07471	0.076357	0.076138	0.049303	0.07745	0.061262	0.060186	0.060199	0.054337	0.078767	0.06116	0.060009	0.059995
-10	0.158471	0.250438	0.181815	0.178468	0.178554	0.331982	0.217191	0.257096	0.262357	0.261972	0.286042	0.283888	0.282359	0.28199	0.281713	0.271456	0.281167	0.28182	0.28217	0.281934	0.097839	0.065217	0.075387	0.076855	0.076518	0.095333	0.064299	0.074441	0.076088	0.07585	0.049327	0.078037	0.06167	0.060533	0.060599	0.054529	0.078669	0.06137	0.060197	0.060239
-9	0.159117	0.250788	0.182224	0.178861	0.178969	0.329316	0.217459	0.257208	0.262549	0.262062	0.284282	0.285303	0.28321	0.282815	0.282596	0.272129	0.280926	0.281643	0.281943	0.281678	0.096373	0.065462	0.075541	0.077023	0.076667	0.094957	0.064197	0.074454	0.076108	0.075857	0.049507	0.078011	0.061795	0.060631	0.060709	0.054281	0.079133	0.061633	0.060428	0.060502
-8	0.159777	0.250892	0.182081	0.178659	0.178793	0.326969	0.217521	0.257567	0.263046	0.262451	0.282718	0.287515	0.283874	0.283377	0.283287	0.273622	0.279428	0.281105	0.281481	0.281132	0.095175	0.065743	0.075567	0.077043	0.076726	0.094625	0.06409	0.074505	0.076231	0.075921	0.050103	0.077386	0.06164	0.060492	0.06056	0.053819	0.080003	0.061824	0.060551	0.060652
-7	0.160483	0.250815	0.181983	0.178522	0.178661	0.324604	0.21747	0.257478	0.263073	0.262403	0.281606	0.289936	0.284387	0.283753	0.283811	0.27503	0.277375	0.280348	0.280793	0.280379	0.094294	0.066079	0.075511	0.076967	0.076694	0.094107	0.063814	0.074433	0.076245	0.075846	0.050714	0.076452	0.061334	0.060182	0.060247	0.053433	0.081026	0.062083	0.060793	0.060899
-6	0.161615	0.250838	0.182332	0.178805	0.178919	0.322847	0.216744	0.256506	0.262093	0.261444	0.280957	0.291285	0.284894	0.284182	0.284295	0.276287	0.275672	0.279137	0.279631	0.279233	0.093578	0.066001	0.075245	0.076662	0.076438	0.093629	0.063387	0.073999	0.075837	0.075414	0.051524	0.075913	0.061069	0.059926	0.059963	0.053388	0.081599	0.062411	0.061101	0.061187
-5	0.162713	0.251177	0.183203	0.179663	0.179738	0.321489	0.215761	0.255039	0.26053	0.259988	0.280257	0.291154	0.285515	0.284808	0.284846	0.277737	0.275128	0.278128	0.278604	0.278207	0.092864	0.065711	0.075029	0.076399	0.076205	0.093446	0.063001	0.073226	0.075011	0.074639	0.052287	0.075832	0.061211	0.060097	0.060096	0.05366	0.081717	0.062792	0.061498	0.061557
-4	0.163602	0.25192	0.183809	0.1803	0.180332	0.320613	0.214955	0.254134	0.259545	0.259049	0.279621	0.289617	0.28558	0.28498	0.284915	0.279112	0.27605	0.277861	0.278279	0.277902	0.092296	0.065213	0.074809	0.076189	0.075994	0.093497	0.062945	0.072796	0.07451	0.074216	0.053071	0.076327	0.061506	0.06043	0.060369	0.054019	0.081289	0.062872	0.061575	0.061638
-3	0.164062	0.252419	0.183839	0.180293	0.180435	0.319991	0.214583	0.254311	0.259801	0.259235	0.279717	0.287301	0.284772	0.284331	0.284179	0.279509	0.278579	0.278708	0.27892	0.278661	0.09202	0.064777	0.074871	0.076319	0.076045	0.093387	0.063198	0.07282	0.074496	0.074229	0.053409	0.077329	0.061896	0.060759	0.06076	0.054386	0.080614	0.062626	0.06135	0.061443
-2	0.164532	0.252888	0.183792	0.180209	0.180468	0.319459	0.214024	0.254866	0.260512	0.259766	0.280062	0.284718	0.283716	0.283493	0.28323	0.278812	0.281645	0.280224	0.280111	0.280088	0.09196	0.064237	0.074975	0.076547	0.076181	0.093007	0.063348	0.073252	0.074868	0.074596	0.053487	0.078617	0.062203	0.06097	0.061055	0.054656	0.079759	0.06229	0.061043	0.061144
-1	0.164657	0.253351	0.184232	0.180573	0.180903	0.318867	0.21294	0.254713	0.260439	0.259621	0.280412	0.282909	0.283151	0.283151	0.282773	0.277934	0.284321	0.281313	0.28099	0.281105	0.091966	0.063737	0.074915	0.076577	0.076137	0.092425	0.063277	0.073381	0.07495	0.074672	0.053391	0.080029	0.062617	0.061295	0.061471	0.054698	0.078923	0.062246	0.061021	0.061101
0	0.164471	0.254124	0.185014	0.181302	0.181667	0.318426	0.211918	0.25379	0.259545	0.258723	0.279953	0.282141	0.28318	0.283284	0.282893	0.277342	0.285349	0.281884	0.281465	0.281601	0.091912	0.06335	0.074591	0.076294	0.075851	0.092206	0.062988	0.073128	0.074654	0.074397	0.053302	0.080825	0.06301	0.061643	0.061848	0.054343	0.07867	0.062461	0.061219	0.061306
1	0.163844	0.254866	0.185733	0.182001	0.182349	0.31777	0.211169	0.25287	0.258701	0.257786	0.27916	0.282857	0.282987	0.283033	0.282785	0.277525	0.285274	0.282077	0.281745	0.281821	0.091763	0.063109	0.073906	0.075575	0.075197	0.091921	0.062881	0.072985	0.074541	0.074278	0.053246	0.080933	0.063205	0.061858	0.062044	0.053804	0.079206	0.062853	0.061587	0.061696
2	0.163691	0.255212	0.185935	0.182164	0.182556	0.317647	0.211127	0.252419	0.258296	0.257377	0.278172	0.283976	0.282548	0.282352	0.282292	0.278172	0.283976	0.282548	0.282352	0.282292	0.091855	0.062873	0.073264	0.074872	0.074563	0.091855	0.062873	0.073264	0.074872	0.074563	0.053421	0.080193	0.063106	0.06177	0.061937	0.053421	0.080193	0.063106	0.06177	0.061937
3	0.163844	0.254866	0.185733	0.182001	0.182349	0.31777	0.211169	0.25287	0.258701	0.257786	0.277525	0.285274	0.282077	0.281745	0.281821	0.27916	0.282857	0.282987	0.283033	0.282785	0.091921	0.062881	0.072985	0.074541	0.074278	0.091763	0.063109	0.073906	0.075575	0.075197	0.053804	0.079206	0.062853	0.061587	0.061696	0.053246	0.080933	0.063205	0.061858	0.062044
4	0.164471	0.254124	0.185014	0.181302	0.181667	0.318426	0.211918	0.25379	0.259545	0.258723	0.277342	0.285349	0.281884	0.281465	0.281601	0.279953	0.282141	0.28318	0.283284	0.282893	0.092206	0.062988	0.073128	0.074654	0.074397	0.091912	0.06335	0.074591	0.076294	0.075851	0.054343	0.07867	0.062461	0.061219	0.061306	0.053302	0.080825	0.06301	0.061643	0.061848
5	0.164657	0.253351	0.184232	0.180573	0.180903	0.318867	0.21294	0.254713	0.260439	0.259621	0.277934	0.284321	0.281313	0.28099	0.281105	0.280412	0.282909	0.283151	0.283151	0.282773	0.092425	0.063277	0.073381	0.07495	0.074672	0.091966	0.063737	0.074915	0.076577	0.076137	0.054698	0.078923	0.062246	0.061021	0.061101	0.053391	0.080029	0.062617	0.061295	0.061471
6	0.164532	0.252888	0.183792	0.180209	0.180468	0.319459	0.214024	0.254866	0.260512	0.259766	0.278812	0.281645	0.280224	0.280111	0.280088	0.280062	0.284718	0.283716	0.283493	0.28323	0.093007	0.063348	0.073252	0.074868	0.074596	0.09196	0.064237	0.074975	0.076547	0.076181	0.054656	0.079759	0.06229	0.061043	0.061144	0.053487	0.078617	0.062203	0.06097	0.061055
7	0.164062	0.252419	0.183839	0.180293	0.180435	0.319991	0.214583	0.254311	0.259801	0.259235	0.279509	0.278579	0.278708	0.27892	0.278661	0.279717	0.287301	0.284772	0.284331	0.284179	0.093387	0.063198	0.072819	0.074496	0.074229	0.09202	0.064777	0.074871	0.076319	0.076045	0.054386	0.080614	0.062626	0.06135	0.061443	0.053409	0.077329	0.061896	0.060759	0.06076
8	0.163602	0.25192	0.183809	0.1803	0.180332	0.320613	0.214955	0.254134	0.259545	0.259049	0.279112	0.27605	0.277861	0.278279	0.277902	0.279621	0.289617	0.28558	0.28498	0.284915	0.093497	0.062945	0.072796	0.07451	0.074216	0.092296	0.065213	0.074809	0.076189	0.075994	0.054019	0.081289	0.062872	0.061575	0.061638	0.053071	0.076327	0.061506	0.06043	0.060369
9	0.162713	0.251177	0.183203	0.179663	0.179738	0.321489	0.215761	0.255039	0.26053	0.259988	0.277737	0.275128	0.278128	0.278604	0.278207	0.280257	0.291154	0.285515	0.284808	0.284846	0.093446	0.063001	0.073226	0.075011	0.074639	0.092864	0.065711	0.075029	0.076399	0.076205	0.05366	0.081717	0.062792	0.061498	0.061557	0.052287	0.075832	0.061211	0.060097	0.060096
10	0.161615	0.250838	0.182332	0.178805	0.178919	0.322847	0.216744	0.256506	0.262093	0.261444	0.276287	0.275672	0.279137	0.279631	0.279233	0.280957	0.291285	0.284894	0.284182	0.284295	0.093629	0.063387	0.073999	0.075837	0.075414	0.093578	0.066001	0.075245	0.076663	0.076438	0.053388	0.081599	0.062411	0.061101	0.061187	0.051524	0.075913	0.061069	0.059926	0.059963
11	0.160483	0.250815	0.181983	0.178522	0.178661	0.324604	0.21747	0.257478	0.263073	0.262403	0.27503	0.277375	0.280348	0.280793	0.280379	0.281606	0.289936	0.284387	0.283753	0.283811	0.094107	0.063814	0.074433	0.076245	0.075846	0.094294	0.066079	0.075511	0.076968	0.076694	0.053433	0.081026	0.062083	0.060793	0.060899	0.050714	0.076452	0.061334	0.060182	0.060247
12	0.159777	0.250892	0.182081	0.178659	0.178793	0.326969	0.217521	0.257567	0.263046	0.262451	0.273622	0.279428	0.281105	0.281481	0.281132	0.282718	0.287515	0.283874	0.283377	0.283287	0.094625	0.06409	0.074505	0.076231	0.075921	0.095175	0.065743	0.075567	0.077043	0.076726	0.053819	0.080003	0.061824	0.060551	0.060652	0.050103	0.077386	0.06164	0.060492	0.06056
13	0.159117	0.250788	0.182224	0.178861	0.178969	0.329316	0.217459	0.257208	0.262549	0.262062	0.272129	0.280926	0.281643	0.281943	0.281678	0.284282	0.285303	0.28321	0.282815	0.282596	0.094957	0.064197	0.074454	0.076108	0.075857	0.096373	0.065462	0.075541	0.077023	0.076667	0.054281	0.079133	0.061633	0.060428	0.060502	0.049507	0.078011	0.061795	0.060631	0.060709
14	0.158471	0.250438	0.181815	0.178468	0.178554	0.331982	0.217191	0.257096	0.262357	0.261972	0.271456	0.281167	0.28182	0.28217	0.281934	0.286042	0.283888	0.282359	0.28199	0.281713	0.095333	0.064299	0.074441	0.076088	0.07585	0.097839	0.065217	0.075387	0.076856	0.076518	0.054529	0.078669	0.06137	0.060197	0.060239	0.049327	0.078037	0.06167	0.060533	0.060599
15	0.157601	0.250385	0.18115	0.1779	0.177856	0.333924	0.217249	0.257661	0.262891	0.262534	0.271897	0.280264	0.281564	0.281993	0.281761	0.286818	0.283531	0.281577	0.281136	0.280847	0.095857	0.06442	0.07471	0.076357	0.076138	0.098981	0.064948	0.07536	0.07681	0.076475	0.054337	0.078767	0.06116	0.060009	0.059995	0.049303	0.07745	0.061262	0.060186	0.060199
16	0.157249	0.249739	0.180522	0.177377	0.177257	0.334817	0.217328	0.258191	0.263354	0.263013	0.273386	0.278636	0.280922	0.28141	0.281183	0.285802	0.283684	0.281041	0.28049	0.280263	0.096286	0.064342	0.074791	0.07645	0.07622	0.099125	0.064666	0.075193	0.076561	0.076309	0.053871	0.079166	0.061063	0.059944	0.059897	0.049735	0.076621	0.060867	0.059867	0.059849
17	0.157543	0.249451	0.180345	0.177286	0.177125	0.334232	0.218136	0.258536	0.263679	0.263301	0.275605	0.276832	0.280108	0.280674	0.280424	0.282839	0.28445	0.280863	0.280175	0.280064	0.096602	0.064253	0.074735	0.076425	0.076186	0.098211	0.064797	0.074979	0.076279	0.076062	0.053156	0.079536	0.061198	0.060123	0.060046	0.050446	0.076007	0.060595	0.059607	0.059583
18	0.158582	0.248841	0.180274	0.177178	0.17708	0.332748	0.21921	0.25844	0.263553	0.263243	0.278369	0.275394	0.279564	0.280242	0.279883	0.279115	0.285938	0.281027	0.280243	0.280259	0.096901	0.064278	0.07466	0.076423	0.076126	0.096495	0.06524	0.074645	0.075883	0.075764	0.05272	0.079951	0.061383	0.060277	0.060243	0.051516	0.075554	0.060498	0.0595	0.059496
19	0.159596	0.248517	0.179856	0.176728	0.176643	0.331201	0.220848	0.259108	0.264299	0.264026	0.280647	0.274877	0.279464	0.280233	0.279823	0.275711	0.28747	0.281353	0.280498	0.280595	0.097113	0.064711	0.07492	0.076709	0.076457	0.094651	0.066103	0.074712	0.075937	0.075865	0.052583	0.080159	0.061389	0.060247	0.060231	0.052257	0.075364	0.06031	0.059309	0.059282
20	0.160204	0.247681	0.178943	0.175796	0.175732	0.329938	0.222132	0.260962	0.266224	0.265974	0.281911	0.275717	0.27991	0.280694	0.280317	0.273545	0.28836	0.281722	0.280815	0.280959	0.097172	0.065276	0.075645	0.077448	0.077242	0.093056	0.066869	0.075245	0.076457	0.076429	0.052788	0.080224	0.061117	0.059922	0.05995	0.052575	0.075245	0.060099	0.05909	0.059065
21	0.160682	0.24723	0.178022	0.174905	0.174846	0.328787	0.223177	0.263079	0.268487	0.268146	0.281807	0.277505	0.280622	0.281367	0.281065	0.273119	0.287985	0.282328	0.281429	0.281568	0.096671	0.065894	0.076338	0.078147	0.077982	0.092182	0.067429	0.076244	0.077482	0.077424	0.053152	0.079837	0.060714	0.059538	0.059567	0.052686	0.075642	0.059959	0.058958	0.058935
22	0.161289	0.247378	0.177604	0.174467	0.174432	0.328124	0.223278	0.264478	0.270021	0.269598	0.280668	0.279852	0.281143	0.281824	0.281592	0.274227	0.286431	0.282652	0.281887	0.281893	0.096033	0.066406	0.076704	0.078561	0.078373	0.092169	0.067307	0.077014	0.078358	0.078217	0.053684	0.07944	0.06051	0.059346	0.059363	0.05276	0.076322	0.060006	0.058961	0.058967
23	0.161467	0.248144	0.177823	0.174652	0.174664	0.328358	0.222567	0.263939	0.269495	0.269063	0.279389	0.282074	0.281547	0.282122	0.281955	0.275852	0.284065	0.282331	0.281782	0.281585	0.095568	0.066852	0.076372	0.078233	0.078046	0.092838	0.066549	0.077109	0.078563	0.078311	0.053944	0.078987	0.060422	0.05927	0.059272	0.052569	0.077186	0.060265	0.059188	0.059225
24	0.160799	0.249154	0.178724	0.175505	0.175556	0.32999	0.221066	0.262055	0.267527	0.267123	0.27883	0.283565	0.281746	0.282189	0.282105	0.277329	0.281787	0.281562	0.281135	0.280773	0.095893	0.066735	0.075616	0.077427	0.077266	0.094073	0.06552	0.076488	0.077983	0.077667	0.053804	0.078833	0.060493	0.059347	0.059342	0.052169	0.077865	0.060751	0.059629	0.059673
25	0.159278	0.250076	0.179527	0.176321	0.176372	0.332565	0.219502	0.25992	0.265258	0.264914	0.279659	0.28359	0.281517	0.281881	0.281873	0.278456	0.280625	0.280863	0.280408	0.280052	0.097044	0.066247	0.074782	0.076534	0.076389	0.095402	0.064651	0.075681	0.077097	0.07681	0.053259	0.078954	0.060578	0.059452	0.059423	0.051733	0.078067	0.061068	0.059962	0.060013
26	0.158055	0.250967	0.179931	0.176828	0.176786	0.334845	0.218617	0.258943	0.264148	0.263804	0.281079	0.282058	0.280974	0.281429	0.281326	0.27897	0.28131	0.280705	0.280123	0.279871	0.098101	0.065532	0.074379	0.076101	0.075901	0.096582	0.064339	0.075237	0.076576	0.076338	0.052542	0.079423	0.060642	0.05954	0.059507	0.051729	0.07797	0.061102	0.060051	0.06005
27	0.157826	0.25126	0.179813	0.176873	0.176764	0.336106	0.218117	0.259255	0.264362	0.264011	0.282933	0.279681	0.280245	0.280884	0.280622	0.279043	0.283499	0.280681	0.279936	0.27988	0.098931	0.064857	0.074394	0.076137	0.075858	0.097307	0.064537	0.075077	0.076347	0.076149	0.05209	0.079976	0.060788	0.059716	0.059657	0.052243	0.077371	0.060798	0.059815	0.059829
28	0.158424	0.251354	0.17956	0.176659	0.176544	0.336024	0.218729	0.260104	0.26516	0.26482	0.284104	0.277297	0.280082	0.280903	0.280395	0.278276	0.286788	0.280979	0.280112	0.280201	0.099032	0.064499	0.074851	0.076623	0.076271	0.097501	0.065406	0.075115	0.076333	0.076201	0.051703	0.08086	0.060895	0.059813	0.059776	0.052835	0.076658	0.060606	0.059665	0.059657
29	0.15923	0.250461	0.179191	0.176299	0.176158	0.334557	0.219903	0.261344	0.266463	0.266208	0.284503	0.275562	0.2803	0.281178	0.280585	0.277741	0.290102	0.281564	0.280633	0.280881	0.098692	0.064546	0.07551	0.077339	0.07698	0.097068	0.066458	0.075458	0.076619	0.07657	0.05164	0.08161	0.061023	0.059975	0.059907	0.053343	0.07578	0.060404	0.05946	0.059459
30	0.160199	0.249138	0.178327	0.175463	0.175255	0.332054	0.222271	0.263112	0.268277	0.26815	0.28401	0.274878	0.280456	0.281291	0.280738	0.277598	0.292316	0.282548	0.281633	0.281885	0.097501	0.065268	0.076311	0.078163	0.077864	0.096566	0.067559	0.076156	0.077294	0.077328	0.051866	0.081838	0.060841	0.059823	0.059729	0.053575	0.075061	0.060095	0.059154	0.059127
31	0.161258	0.247465	0.177233	0.174388	0.17413	0.329327	0.224457	0.265277	0.270456	0.27043	0.283059	0.275626	0.28065	0.281403	0.280977	0.278316	0.2929	0.28347	0.282592	0.282794	0.096251	0.066357	0.077019	0.078863	0.07865	0.095996	0.068273	0.077126	0.078264	0.078309	0.052347	0.081324	0.060404	0.059382	0.059285	0.053724	0.074716	0.05969	0.05876	0.058741
32	0.162284	0.246617	0.176189	0.173302	0.17309	0.327246	0.226273	0.267053	0.272258	0.272294	0.281833	0.277788	0.280697	0.281359	0.281078	0.279527	0.291622	0.283638	0.282792	0.28292	0.095385	0.067489	0.077421	0.079249	0.079112	0.095793	0.068635	0.077922	0.079104	0.079157	0.052915	0.08039	0.059864	0.058798	0.058711	0.053727	0.075027	0.059439	0.058489	0.058523
33	0.1629	0.246569	0.175689	0.172701	0.172565	0.326141	0.22673	0.267988	0.273234	0.273269	0.280242	0.280192	0.280919	0.281481	0.281284	0.280741	0.289594	0.283211	0.282468	0.282491	0.094868	0.068113	0.07745	0.079248	0.079143	0.095521	0.068586	0.078397	0.079627	0.079659	0.05336	0.079624	0.059482	0.058379	0.058307	0.05358	0.075837	0.059466	0.058503	0.058563
34	0.162973	0.247199	0.175679	0.172679	0.172559	0.32603	0.225968	0.267773	0.273054	0.273153	0.27896	0.281294	0.281007	0.281475	0.281346	0.281966	0.287989	0.282458	0.281888	0.281821	0.094734	0.067876	0.077241	0.079002	0.07893	0.095668	0.068302	0.078316	0.079635	0.079653	0.053694	0.079076	0.059323	0.058246	0.058159	0.053273	0.076583	0.059588	0.058585	0.058641
35	0.162778	0.248181	0.175849	0.172858	0.172693	0.327623	0.224188	0.267263	0.272518	0.272711	0.278889	0.280426	0.280856	0.281311	0.28122	0.282732	0.287706	0.282075	0.281621	0.281463	0.095291	0.066966	0.077036	0.078759	0.078742	0.096258	0.067898	0.078063	0.079398	0.079401	0.053794	0.079145	0.05929	0.058256	0.058157	0.053204	0.076703	0.05963	0.058644	0.058644
36	0.161944	0.249356	0.175734	0.172725	0.172493	0.330156	0.222277	0.266981	0.272239	0.272541	0.279716	0.278243	0.280452	0.280994	0.280901	0.282982	0.289049	0.281798	0.281268	0.281163	0.096198	0.066022	0.076958	0.078717	0.078712	0.096947	0.067519	0.077778	0.079097	0.079125	0.053419	0.079795	0.059325	0.058325	0.058193	0.053129	0.076402	0.059412	0.058396	0.058359
37	0.161787	0.250027	0.175432	0.172416	0.172052	0.332142	0.221247	0.267375	0.272725	0.273058	0.280561	0.275373	0.279871	0.280599	0.280411	0.282956	0.291443	0.281656	0.280887	0.280873	0.096804	0.06525	0.077072	0.078952	0.078907	0.097501	0.067413	0.077688	0.078927	0.079015	0.052962	0.080868	0.059263	0.058259	0.058057	0.053614	0.075637	0.059157	0.058174	0.058089
38	0.162083	0.249868	0.175045	0.172004	0.171556	0.331794	0.221433	0.268682	0.274129	0.274467	0.280454	0.272358	0.279125	0.279996	0.279702	0.28274	0.294723	0.282007	0.281012	0.281111	0.096486	0.064846	0.077489	0.079454	0.079355	0.097451	0.067768	0.077955	0.07913	0.079306	0.052648	0.082081	0.059307	0.058257	0.058022	0.053916	0.074529	0.058725	0.057775	0.057636
39	0.162706	0.248817	0.174363	0.171351	0.170864	0.329846	0.222916	0.270281	0.275815	0.27618	0.279602	0.269701	0.278231	0.279145	0.278784	0.282668	0.297376	0.283016	0.281909	0.282044	0.095643	0.064958	0.077903	0.079912	0.079814	0.09712	0.068527	0.078507	0.079675	0.07987	0.05283	0.082959	0.059442	0.058339	0.058117	0.053979	0.073112	0.058145	0.057228	0.057072
40	0.162874	0.247314	0.17355	0.170541	0.170096	0.327507	0.225079	0.272076	0.277567	0.277971	0.278591	0.269227	0.277545	0.278445	0.278163	0.282385	0.298571	0.284277	0.283175	0.283267	0.094628	0.065695	0.078437	0.080441	0.080379	0.096736	0.069213	0.079181	0.080353	0.080536	0.052865	0.083215	0.059605	0.05847	0.058298	0.053694	0.072417	0.057575	0.056649	0.056526
41	0.162929	0.245986	0.172713	0.169737	0.16932	0.325443	0.226949	0.27369	0.279186	0.279578	0.277534	0.27075	0.277144	0.277964	0.277748	0.282652	0.297491	0.285089	0.284068	0.284032	0.093588	0.066653	0.078693	0.080679	0.080659	0.096382	0.069608	0.079785	0.081	0.081089	0.053137	0.082455	0.059579	0.05848	0.058309	0.053199	0.072688	0.057302	0.056357	0.056264
42	0.163773	0.245116	0.172158	0.169147	0.16878	0.323804	0.228379	0.275028	0.280485	0.280851	0.276158	0.273707	0.277289	0.278033	0.277875	0.283331	0.294897	0.28511	0.284197	0.284121	0.0926	0.067287	0.078825	0.080756	0.080757	0.096089	0.069779	0.080344	0.081577	0.081626	0.053645	0.081114	0.059179	0.058108	0.057976	0.05303	0.073769	0.057418	0.056438	0.056372
43	0.16456	0.244893	0.171646	0.168613	0.168325	0.322425	0.228877	0.275952	0.28145	0.281761	0.274964	0.276799	0.277876	0.278602	0.278358	0.284376	0.292009	0.284391	0.283555	0.283463	0.092009	0.067714	0.078905	0.08079	0.080771	0.095859	0.069652	0.08071	0.082019	0.081992	0.054408	0.079802	0.05864	0.057603	0.0575	0.052781	0.074994	0.057658	0.056667	0.056616
44	0.165089	0.245093	0.171325	0.168253	0.16805	0.322463	0.228429	0.275841	0.281281	0.281606	0.274373	0.279075	0.278624	0.279436	0.279131	0.285144	0.28973	0.283457	0.282586	0.282548	0.091931	0.067686	0.078865	0.080752	0.08068	0.096006	0.069275	0.08069	0.081971	0.081946	0.054957	0.079002	0.058142	0.057066	0.057027	0.052792	0.075823	0.057872	0.056881	0.05688
45	0.164919	0.245792	0.171573	0.168591	0.168369	0.323254	0.227145	0.274784	0.280137	0.280531	0.275021	0.27986	0.279132	0.280027	0.279699	0.285582	0.288875	0.282643	0.28168	0.281598	0.092346	0.067403	0.078677	0.080592	0.080492	0.096434	0.068799	0.080222	0.081431	0.081438	0.055012	0.078833	0.057993	0.056905	0.056867	0.052943	0.076263	0.05813	0.057197	0.057179
46	0.164676	0.246762	0.172362	0.169452	0.169156	0.324354	0.225629	0.273644	0.278934	0.279367	0.276062	0.278658	0.279182	0.280075	0.279865	0.285563	0.28947	0.282244	0.281199	0.281156	0.092701	0.066755	0.078167	0.080094	0.080027	0.096785	0.0686	0.079845	0.080945	0.081021	0.054912	0.07926	0.058087	0.056992	0.056945	0.053256	0.076031	0.058458	0.057555	0.057534
47	0.164317	0.24745	0.172834	0.169946	0.169626	0.324713	0.224765	0.273241	0.278605	0.27899	0.277372	0.276413	0.278947	0.279848	0.279632	0.28496	0.291496	0.282233	0.281138	0.281122	0.092827	0.066172	0.07799	0.079933	0.079869	0.096876	0.068659	0.079654	0.080755	0.080863	0.054419	0.080118	0.058249	0.057187	0.05711	0.053876	0.075475	0.058611	0.057719	0.057677
48	0.164212	0.247551	0.172538	0.169575	0.169248	0.324266	0.224651	0.274365	0.279847	0.280147	0.279152	0.27399	0.278834	0.279818	0.279487	0.283141	0.294054	0.282598	0.281459	0.281529	0.092894	0.065803	0.078494	0.080487	0.080343	0.096603	0.069105	0.079877	0.081	0.081151	0.053636	0.081122	0.058234	0.057165	0.057048	0.054631	0.07456	0.058403	0.05751	0.05745
49	0.164825	0.247074	0.171466	0.168485	0.168084	0.323167	0.225527	0.27633	0.281925	0.282241	0.281906	0.272816	0.278657	0.279684	0.279195	0.28038	0.295878	0.283119	0.281919	0.282048	0.093069	0.065883	0.079249	0.081272	0.08113	0.095819	0.069643	0.080345	0.081486	0.081686	0.052967	0.081638	0.058072	0.05702	0.056836	0.055761	0.073932	0.057876	0.057002	0.056847
50	0.166239	0.246315	0.170085	0.167103	0.166566	0.321447	0.227068	0.278503	0.284085	0.284585	0.284528	0.273279	0.278571	0.279473	0.279044	0.277661	0.295898	0.283403	0.282158	0.282373	0.093186	0.066329	0.079898	0.081872	0.081841	0.094722	0.070181	0.080941	0.082038	0.082348	0.052561	0.081634	0.057776	0.056692	0.056484	0.056795	0.073647	0.057292	0.056429	0.056187
51	0.168038	0.245154	0.168979	0.166009	0.165362	0.319243	0.229147	0.280522	0.286107	0.286817	0.286082	0.27556	0.278761	0.279516	0.279174	0.276195	0.29432	0.283027	0.281769	0.282059	0.09319	0.067241	0.080411	0.082289	0.082429	0.093419	0.070387	0.081388	0.082463	0.082874	0.052939	0.080986	0.057406	0.056343	0.056095	0.057413	0.074065	0.056945	0.056063	0.055772
52	0.169339	0.243964	0.168145	0.165143	0.16451	0.317729	0.231103	0.282248	0.287793	0.288673	0.286348	0.278578	0.279308	0.279961	0.279733	0.276278	0.291748	0.282443	0.281229	0.281564	0.093175	0.068306	0.081023	0.082822	0.08306	0.092636	0.07045	0.081949	0.083032	0.083511	0.053514	0.079999	0.057072	0.055986	0.055752	0.057504	0.074745	0.05668	0.055773	0.055515
53	0.169127	0.242919	0.167681	0.164703	0.164036	0.317571	0.232889	0.283493	0.288988	0.289932	0.286008	0.281437	0.28009	0.280708	0.280547	0.276958	0.289115	0.28201	0.280898	0.281165	0.093488	0.069572	0.081703	0.083463	0.083763	0.092446	0.070441	0.082327	0.08346	0.083918	0.053978	0.078632	0.056765	0.055684	0.055437	0.056942	0.075498	0.056612	0.055683	0.055424
54	0.168139	0.242969	0.167374	0.164444	0.163728	0.31908	0.233258	0.283821	0.289202	0.290231	0.285957	0.283588	0.280871	0.281451	0.281425	0.277169	0.286569	0.281796	0.28083	0.280935	0.094184	0.070386	0.082052	0.083812	0.084179	0.092713	0.069904	0.082574	0.083709	0.084142	0.053919	0.077745	0.056514	0.055483	0.055206	0.056413	0.076087	0.056654	0.055703	0.055439
55	0.16678	0.244739	0.167589	0.164658	0.163948	0.321534	0.232287	0.283214	0.288533	0.289567	0.286558	0.284288	0.281264	0.281745	0.281839	0.276803	0.28643	0.281535	0.280639	0.280608	0.09529	0.070601	0.081987	0.083744	0.084122	0.093347	0.069567	0.082371	0.083519	0.083911	0.053513	0.077914	0.056467	0.055481	0.05516	0.055835	0.076521	0.056895	0.055898	0.055647
56	0.165723	0.246923	0.168426	0.165403	0.164812	0.324535	0.230628	0.281957	0.287286	0.288255	0.287625	0.283025	0.281087	0.281534	0.28163	0.275698	0.289061	0.281215	0.280301	0.280262	0.096665	0.070075	0.081561	0.083351	0.083663	0.093923	0.069693	0.081957	0.083095	0.083451	0.052945	0.079282	0.05667	0.055693	0.055385	0.055462	0.076337	0.057215	0.056173	0.05598
57	0.164424	0.248105	0.169694	0.166634	0.166125	0.327529	0.228578	0.280616	0.286071	0.286837	0.289209	0.280903	0.280481	0.281014	0.280998	0.2739	0.291517	0.281352	0.280364	0.280373	0.098221	0.068959	0.081099	0.082952	0.083145	0.094512	0.069573	0.081431	0.082634	0.082875	0.052028	0.080449	0.057341	0.056311	0.056058	0.055261	0.07562	0.057394	0.056394	0.056208
58	0.163291	0.247641	0.170544	0.167472	0.167036	0.329439	0.227422	0.279727	0.285168	0.285758	0.291153	0.279803	0.279416	0.280127	0.279862	0.271708	0.291487	0.282031	0.280947	0.281016	0.099697	0.06829	0.080729	0.082607	0.08266	0.094395	0.06886	0.081003	0.082184	0.082345	0.051056	0.080767	0.058011	0.056914	0.056765	0.055393	0.074725	0.057211	0.056261	0.056054
59	0.162925	0.246173	0.17063	0.167658	0.167269	0.329355	0.227592	0.279377	0.284797	0.285192	0.29298	0.279861	0.278649	0.279484	0.278907	0.270081	0.289623	0.282976	0.281845	0.282016	0.100256	0.068444	0.080464	0.082362	0.082251	0.093844	0.067957	0.080858	0.082025	0.082113	0.050598	0.080114	0.058492	0.057387	0.057323	0.055816	0.073991	0.056921	0.056039	0.055794
60	0.16379	0.244168	0.170277	0.167323	0.166994	0.327627	0.230019	0.280007	0.285358	0.285551	0.293477	0.280484	0.278156	0.278975	0.278077	0.26973	0.288593	0.283281	0.282132	0.2824	0.099837	0.06965	0.080459	0.082338	0.082018	0.092867	0.068341	0.081107	0.08222	0.082255	0.050928	0.079441	0.058417	0.057327	0.057333	0.056174	0.073348	0.056808	0.055902	0.055664
61	0.165016	0.241129	0.169751	0.166852	0.166579	0.324699	0.233777	0.281491	0.286823	0.28677	0.292037	0.28154	0.278571	0.279333	0.278313	0.270201	0.288309	0.283096	0.281916	0.282302	0.098602	0.071266	0.080789	0.082683	0.082189	0.092006	0.069406	0.081765	0.082848	0.082852	0.051638	0.078383	0.058031	0.056968	0.056995	0.05629	0.07241	0.056965	0.056046	0.055885
62	0.166386	0.237844	0.169463	0.166509	0.166412	0.32223	0.237926	0.283755	0.289074	0.28878	0.289618	0.28338	0.279322	0.280112	0.279011	0.2713	0.287039	0.282783	0.281587	0.28198	0.09734	0.073107	0.08177	0.083671	0.083046	0.091524	0.070454	0.082586	0.083685	0.083598	0.052568	0.077149	0.05765	0.056578	0.056668	0.056153	0.071824	0.057043	0.056086	0.056014
63	0.166934	0.235548	0.168934	0.165946	0.165984	0.320636	0.241347	0.286058	0.291376	0.290988	0.287184	0.28588	0.28004	0.280867	0.279795	0.273233	0.285178	0.282945	0.28174	0.282181	0.096429	0.074784	0.082959	0.084898	0.084266	0.091668	0.070959	0.083198	0.084294	0.084184	0.053273	0.075808	0.057517	0.056426	0.056588	0.055801	0.071903	0.056803	0.055843	0.05583
64	0.166652	0.234707	0.168275	0.165262	0.165234	0.320889	0.242719	0.287372	0.292599	0.292459	0.285523	0.287857	0.280648	0.281502	0.28044	0.27526	0.283722	0.28319	0.282013	0.282444	0.095933	0.075766	0.083979	0.085914	0.085341	0.092207	0.071052	0.083486	0.084536	0.084545	0.053542	0.075075	0.057254	0.056151	0.056268	0.055256	0.072352	0.056562	0.055603	0.055579
65	0.165488	0.235248	0.168326	0.165323	0.165156	0.322344	0.242105	0.287149	0.292249	0.292522	0.285134	0.288261	0.28139	0.282194	0.281332	0.276416	0.283557	0.283444	0.282236	0.282693	0.096202	0.075541	0.084133	0.086015	0.085638	0.092995	0.070892	0.083739	0.084756	0.084981	0.053264	0.075116	0.057114	0.055999	0.055994	0.054833	0.072639	0.056814	0.055864	0.055864
66	0.164199	0.235921	0.168662	0.165694	0.165421	0.324677	0.24044	0.286465	0.291396	0.291931	0.285956	0.286123	0.281938	0.282705	0.282043	0.276098	0.285147	0.28337	0.282083	0.282548	0.096995	0.074543	0.084111	0.085874	0.08569	0.09373	0.070732	0.083977	0.084932	0.08533	0.052712	0.075972	0.056875	0.055767	0.055642	0.054777	0.072065	0.05714	0.056221	0.056173
67	0.16338	0.236398	0.168853	0.165943	0.165574	0.327131	0.238898	0.285845	0.290696	0.291265	0.286997	0.282305	0.282327	0.283063	0.282605	0.275468	0.287752	0.283385	0.282026	0.282498	0.098159	0.073161	0.084308	0.085984	0.085996	0.094595	0.07053	0.084016	0.084949	0.085391	0.052339	0.077428	0.057019	0.055904	0.055719	0.054783	0.071134	0.056962	0.056104	0.055964
68	0.162643	0.237067	0.168606	0.165817	0.165194	0.328966	0.236756	0.286025	0.290847	0.291363	0.286759	0.278198	0.282687	0.283505	0.283178	0.276155	0.290608	0.282981	0.281558	0.281895	0.098715	0.071751	0.084928	0.086585	0.086716	0.095335	0.070228	0.083879	0.084744	0.08516	0.052314	0.078753	0.057018	0.055951	0.055647	0.054226	0.070191	0.056552	0.055791	0.055474
69	0.162212	0.237968	0.168182	0.165429	0.164642	0.32967	0.234824	0.286248	0.291017	0.291661	0.285205	0.275236	0.283583	0.284436	0.284298	0.278355	0.29306	0.282198	0.280729	0.280941	0.098235	0.070254	0.085579	0.087208	0.087557	0.096441	0.070179	0.08359	0.08443	0.084813	0.052531	0.079615	0.056906	0.055819	0.055436	0.053584	0.070091	0.056277	0.055569	0.055165
70	0.162652	0.238486	0.16798	0.165154	0.164235	0.328502	0.23429	0.287325	0.292153	0.292989	0.282842	0.275287	0.285455	0.286258	0.286323	0.280732	0.293635	0.280313	0.278959	0.278944	0.096658	0.069352	0.087097	0.088735	0.089309	0.097017	0.071142	0.08318	0.08406	0.084349	0.052755	0.079244	0.056569	0.055498	0.055076	0.053391	0.070983	0.056054	0.055311	0.054812
71	0.164563	0.237987	0.167411	0.164543	0.163466	0.325315	0.236207	0.289252	0.294028	0.295218	0.280892	0.279353	0.287874	0.288375	0.288693	0.282022	0.291008	0.277248	0.2762	0.275941	0.09493	0.070244	0.088922	0.09049	0.091339	0.096528	0.072074	0.082685	0.083555	0.083843	0.053338	0.077977	0.055949	0.054949	0.054497	0.054075	0.07259	0.055906	0.055054	0.054494

## Sheet: Table 3. Comparison of peaks in human and mouse
Source
Human	CD4+
Mouse	NAC control mouse
							Peaks in SHL
			SHL										Total in organism		Coinciding positions
	Dinucleotide	Total Peaks	Minor	Major	Species		SHL	Human.apoptotic	Human.CD4+	Mouse.con	Mouse.sus	Mouse.res	Human	Mouse	cHuman	cMouse
	WW	12	0	12	Human		-6.5	3	2	0	1	0	5	1	3	1
		16	4	12	Mouse		-6	2	2	4	4	3	4	11	3	4
	SS	13	9	2	Human		-5.5	4	1	1	1	2	5	4	4	2
		13	8	2	Mouse		-5	1	2	2	2	2	3	6	3	2
	AA	14	2	9	Human		-4.5	1	2	1	1	1	3	3	3	1
		15	3	12	Mouse		-4	1	2	1	1	1	3	3	3	1
	TT	14	1	11	Human		-3.5	2	1	1	1	1	3	3	3	1
		15	3	11	Mouse		-3	2	3	2	4	2	5	8	3	4
	CC	14	3	5	Human		-2.5	3	1	2	3	2	4	7	3	3
		16	8	4	Mouse		-2	2	3	3	3	3	5	9	3	3
	GG	14	6	1	Human		-1.5	1	0	3	3	3	1	9	1	4
		16	10	2	Mouse		-1	1	3	3	4	3	4	10	3	4
	RR	14	3	2	Human		-0.5	3	2	3	2	2	5	7	4	3
		13	4	4	Mouse		0.5	3	1	4	3	3	4	10	3	4
	YY	14	2	7	Human		1	0	3	2	3	2	3	7	3	3
		13	2	8	Mouse		1.5	2	1	2	3	3	3	8	2	3
							2	3	4	2	2	2	7	6	4	2
							2.5	2	2	1	2	1	4	4	3	2
							3	1	4	2	2	2	5	6	4	2
							3.5	3	2	2	2	2	5	6	3	2
							4	0	2	2	3	3	2	8	2	3
							4.5	1	2	1	1	1	3	3	3	1
							5	3	2	1	1	1	5	3	3	1
							5.5	3	2	3	3	3	5	9	3	3
							6	4	2	3	3	2	6	8	4	3
							6.5	4	2	1	2	1	6	4	4	2

## Sheet: Table 4. Ladder of dinucleotide peaks for Figures 2 and 3
Pos	BP	SHL		SS 1		WW 1				SS 2		WW 2		Pos	SHL			RR 1		YY 1				RR 2		YY 2
2	-72	NA												-72	NA
3	-71	NA												-71	NA					H
4	-70	NA				M				Y				-70	NA			M
5	-69	-6.5												-69	-6.5
6	-68	-6.5		H										-68	-6.5
7	-67	-6.5										A		-67	-6.5									A
8	-66	-6.5												-66	-6.5
9	-65	NA		M								Y		-65	NA									Y		A
10	-64	-6								Y				-64	-6											Y
11	-63	-6												-63	-6					H
12	-62	-6				M	H							-62	-6		H	M
13	-61	-6							A	Y				-61	-6
14	-60	-6												-60	-6
15	-59	-5.5												-59	-5.5
16	-58	-5.5												-58	-5.5											A
17	-57	-5.5		M								Y		-57	-5.5									Y
18	-56	-5.5										A		-56	-5.5									A
19	-55	NA		H										-55	NA											Y
20	-54	NA												-54	NA
21	-53	-5												-53	-5					M	H
22	-52	-5				M	H							-52	-5		H	M
23	-51	-5								Y		Y		-51	-5									Y
24	-50	NA								A				-50	NA											A
25	-49	NA												-49	NA											Y
26	-48	-4.5												-48	-4.5
27	-47	-4.5												-47	-4.5											Y
28	-46	-4.5		H								Y		-46	-4.5									Y
29	-45	-4.5		M								A		-45	-4.5									A		Y
30	-44	NA												-44	NA					M
31	-43	NA												-43	NA					H
32	-42	-4							A	Y				-42	-4
33	-41	-4				M	H							-41	-4		H	M
34	-40	-4												-40	-4
35	-39	NA												-39	NA											Y
36	-38	NA												-38	NA											Y
37	-37	-3.5												-37	-3.5
38	-36	-3.5								Y		Y		-36	-3.5									Y
39	-35	-3.5		H								A		-35	-3.5									A		A
40	-34	-3.5												-34	-3.5
41	-33	NA		M										-33	NA
42	-32	-3								A				-32	-3					M	H
43	-31	-3				M	H			Y				-31	-3		H	M
44	-30	-3												-30	-3									Y
45	-29	-3												-29	-3
46	-28	NA												-28	NA
47	-27	-2.5												-27	-2.5											A
48	-26	-2.5		H										-26	-2.5
49	-25	-2.5										Y	A	-25	-2.5								Y	A		Y
50	-24	-2.5		M										-24	-2.5
51	-23	NA												-23	NA					H
52	-22	-2												-22	-2					M
53	-21	-2								A				-21	-2
54	-20	-2				M	H			Y				-20	-2
55	-19	-2												-19	-2
56	-18	NA												-18	NA											A
57	-17	-1.5												-17	-1.5											Y
58	-16	-1.5												-16	-1.5
59	-15	-1.5				M						Y		-15	-1.5			M						Y
60	-14	-1.5										A		-14	-1.5									A
61	-13	NA												-13	NA
62	-12	-1												-12	-1					M	H
63	-11	-1		M						Y				-11	-1
64	-10	-1		H		M	H							-10	-1		H	M
65	-9	-1								Y				-9	-1
66	-8	NA												-8	NA
67	-7	-0.5												-7	-0.5
68	-6	-0.5												-6	-0.5											Y
69	-5	-0.5		M										-5	-0.5											A
70	-4	-0.5				M								-4	-0.5			M
71	-3	NA								A				-3	NA
72	-2	NA												-2	NA					H
73	-1	NA								Y		Y		-1	NA									Y
74	0	NA	H	M						Y		Y		0	NA									Y

## Sheet: Table S5. Dinucleotide peaks in pattern classes
centered	-72	-71	-70	-69	-68	-67	-66	-65	-64	-63	-62	-61	-60	-59	-58	-57	-56	-55	-54	-53	-52	-51	-50	-49	-48	-47	-46	-45	-44	-43	-42	-41	-40	-39	-38	-37	-36	-35	-34	-33	-32	-31	-30	-29	-28	-27	-26	-25	-24
shl	NA	NA	NA	-6.5	-6.5	-6.5	-6.5	NA	-6	-6	-6	-6	-6	-5.5	-5.5	-5.5	-5.5	NA	NA	-5	-5	-5	NA	NA	-4.5	-4.5	-4.5	-4.5	NA	NA	-4	-4	-4	NA	NA	-3.5	-3.5	-3.5	-3.5	NA	-3	-3	-3	-3	NA	-2.5	-2.5	-2.5	-2.5
CLASS1	-	-	-	-	-	-	-	-	-	-	-	-	-	-	-	-	-	-	-	-	-	-	-	-	-	-	-	-	-	-	-	-	-	-	-	-	-	-	-	-	-	-	-	-	-	-	-	-	-
Mm.NAC	-	GG	-	-	-	-	-	SSGG	CC	-	-	-	CC	-	-	SSGG	-	CC										SSCCGG							GG				GG	SSCC						GG			SSCC
Hs.CD4+	-	-	-	-	SS	-	-	-	-	-	-	-	-	-	-	-	-	SS	-	-	-	-	-	-	-	-	SS	-	-	-	-	-	-	-	-	-	-	SS	-	-	-	-	-	-	-	-	SS	-	-
Hs.Apo.	-	-	-	-	AA	WW	TT	-	-	-	-	-	-	-	-	TT	WW	AA						TT				WWAA										WWTTAA									TTAA	WW
S.cer.	-	-	-	-	-	-	-	WW	-	-	-	-	-	-	-	WW	-	-	-	-	-	WW	-	-	-	-	WW	-	-	-	-	-	-	-	-	-	WW	-	-	-	-	-	-	-	-	-	-	WW	-
CLASS4	-	-	-	-	-	-	-	-	-	-	-	-	-	-	-	-	-	-	-	-	-	-	-	-	-	-	-	-	-	-	-	-	-	-	-	-	-	-	-	-	-	-	-	-	-	-	-	-	-
Mm.-NAC	-	-	TT		-	-	-	AA	-	TT	-	-	-	-	-	-	-	-	-	-	TTAA	-	-	-	-	-	-	-	-	-	-	TTAA	-	-	-	-	-	-	-	-	-	TTAA	-	-	-	-	-	-	-
Hs.-CD4+	-	TT	-	-	-	-	-	-	-	-	TTAAWW	-	-	-	-	-	-	-	AA	TT	WW	-	AA	-	-	-	-	-	-	-	-	TTWW	AA	-	-	-	-	-	-	-	-	TTWW	AA	-	-	-	-	-	-
Hs.Apo.	-	-	-	-	-	-	-	-	-	-	-	SS	-	-	-	-	-	-	-	-	-	-	SS	-	-	-	-	-	-	-	SS	-	-	-	-	-	-	-	-	-	SS	-	-	-	-	-	-	-	-
S.cer.	-	-	SS	-	-	-	-	-	SS	-	-	SS	-	-	-	-	-	-	-	-	-	SS	-	-	-	-	-	-	-	-	SS	-	-	-	-	-	SS	-	-	-	-	SS	-	-	-	-	-	-	-
CLASS2	-	-	-	-	-	-	-	-	-	-	-	-	-	-	-	-	-	-	-	-	-	-	-	-	-	-	-	-	-	-	-	-	-	-	-	-	-	-	-	-	-	-	-	-	-	-	-	-	-
Mm.NAC	-	-	RR	-	-	-	-	-	-	-	RR	-	-	-	-	-	-	-	-	-	RR	-	-	-	-	-	-	-	-	-	-	RR	-	-	-	-	-	-	-	-	-	RR	-	-	-	-	-	-	-
Hs.CD4+	-	-	-	-	-	GG	-	-	-	-	RR	-	-	-	-	-	GG	-	-	-	RR	-	-	-	-	GG	-	-	-	-	-	RR	-	-	GG	-	-	-	-	-	-	RR	-	-	GG	-	-	-	-
Hs.Apo.	-	-	-	-	-	-	-	YYCC	-	-	-	-	-	CC	YY	-	-	-	-	-	-	-	YYCC	-	-	-	-	-	-	-	-	-	-	-	-	CC	-	YY	-	-	-	-	CC	-	-	YY	-	-	-
S.cer.	-	-	-	-	-	-	-	RR	-	-	-	-	-	-	-	RR	-	-	-	-	-	RR	-	-	-	-	RR	-	-	-	-	-	-	-	-	-	RR	-	-	-	-	-	-	-	-	-	-	RR	-
CLASS3	-	-	-	-	-	-	-	-	-	-	-	-	-	-	-	-	-	-	-	-	-	-	-	-	-	-	-	-	-	-	-	-	-	-	-	-	-	-	-	-	-	-	-	-	-	-	-	-	-
Mm.NAC	-	-	-	-	-	-	-	-	-	-	-	-	-	-	-	-	-	-	-	YY	-	-	-	-	-	-	-	-	YY	-	-	-	-	-	-	-	-	-	-	-	YY	-	-	-	-	-	-	-	-
Hs.CD4+	-	YY	CC	-	-	-	-	-	-	CCYY	-	-	-	-	-	-	-	-	-	CCYY	-	-	-	-	-	-	-	-	-	CCYY	-	-	-	-	-	-	-	-	-	CC	YY	-	-	-	-	-	-	-	-
Hs.Apo.	-	GG	-	-	-	RR	-	-	-	-	GG	-	-	-	-	-	RR	-	-	-	-	GG	-	-	-	-	-	RR	-	GG	-	-	-	-	-	-	-	RR	-	GG	-	-	-	-	-	-	-	RR	-
S.cer.	-	-	-	-	-	-	-	-	YY	-	-	-	-	-	-	-	-	YY	-	-	-	-	-	YY	-	YY	-	YY	-	-	-	-	-	YY	YY	-	-	-	-	-	-	-	YY	-	-	-	-	YY	-
[truncated: 24 more columns]
